# Supplementary material for: Pirfenidone Protects from UVB-Induced Photodamage in Hairless Mice
Source: MDPI journal article supplement (doi:10.3390/molecules28072929), 2023-03-24
Supplement: s1 [file s1]

## Supplementary Materials

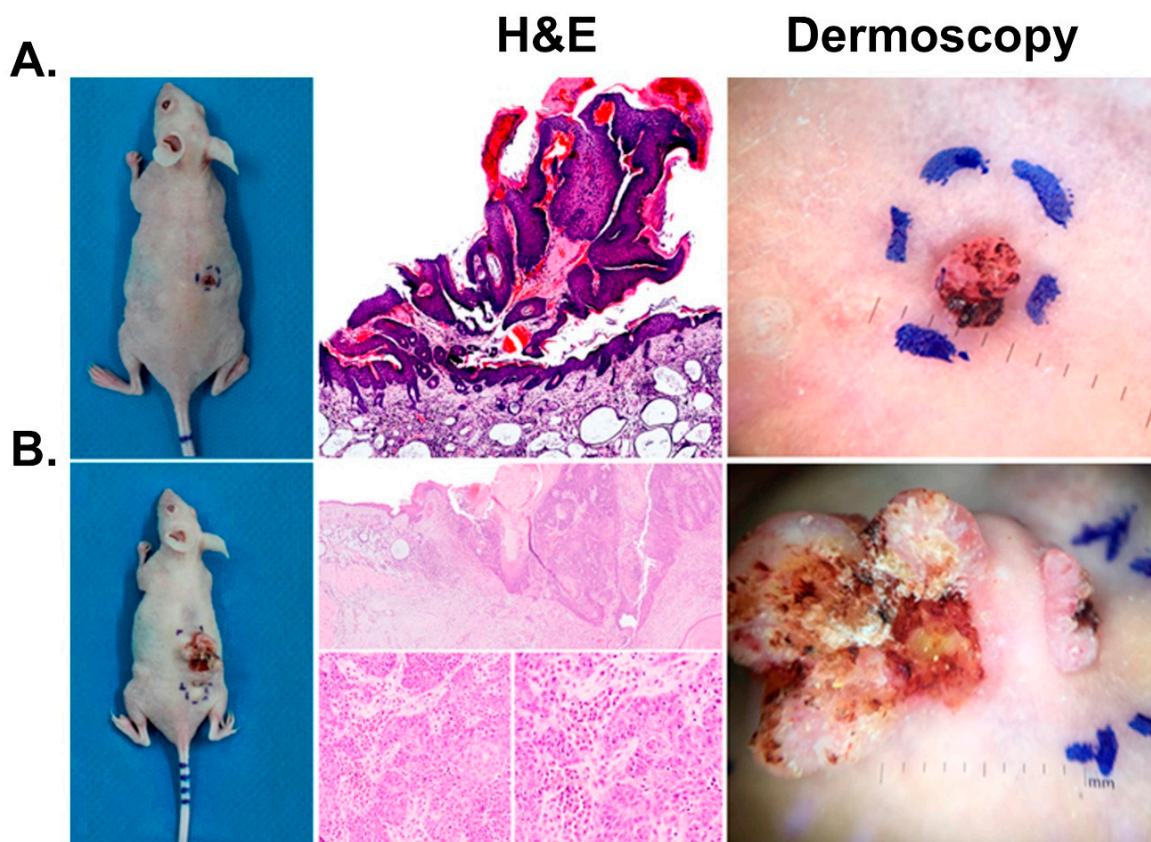

**Figure S1. UVB-induced skin tumors in mice treated with tretinoin (UVB+TRE 12).** Photography, histology and dermoscopy of skin tumors in mice developed during the study of 12 weeks. Both cases in TRE treated mice correspond to (A) papilloma, and exophytic and epidermal tumor; and (B) squamous cell carcinoma moderately differentiated with keratin pearls and deep infiltration with ulcerative aspect.

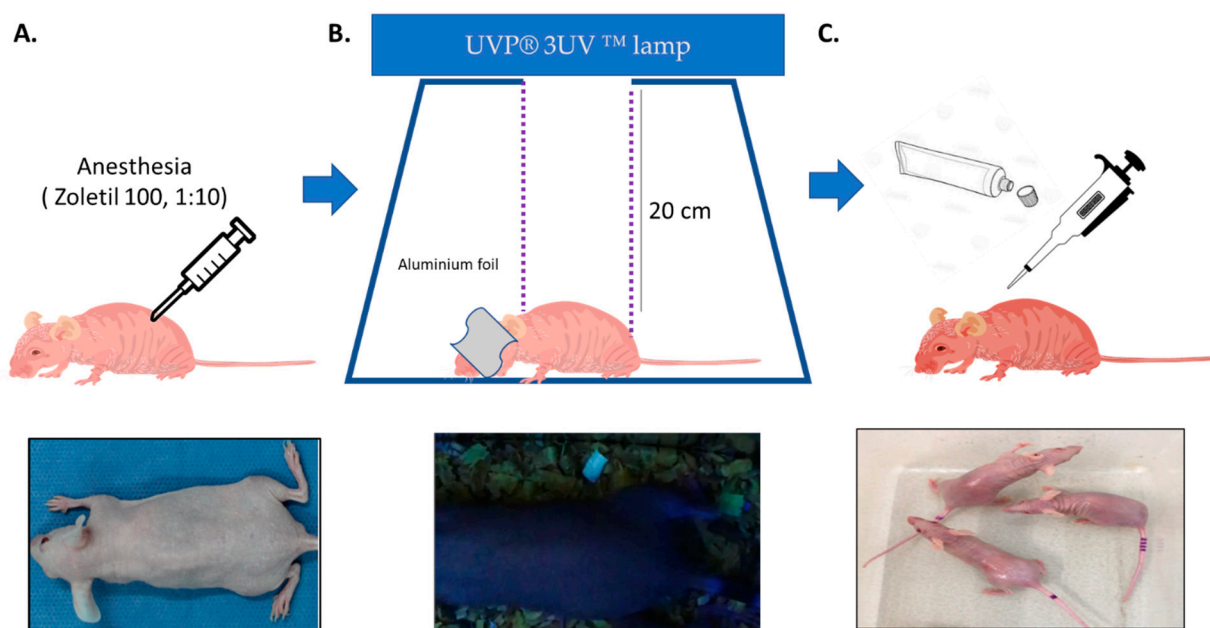

**Figure S2. UVB exposition in hairless mice.** A) All mice were anesthetized with 50 $\mu$ L of Zoletil100 (diluted 1:100). B) Irradiance at the dorsal surface of the mice (20 cm from the lamp) was 0.217

mW/cm<sup>2</sup> of UVB and was reached by exposure for 12 min as measured with an UVX Radiometer (UVP Analytik Jena US LLC). Exposure was performed three times a week, increasing one minimal erythema dose (MED) weekly until 4 MED were reached and maintained until week 12. C) After irradiation, 50  $\mu$ L of TRE (0.05% Retin-A® cream) or 50  $\mu$ L of PFD (8% pirfenidone gel) was immediately applied to dorsal surface of the mouse.
